# Supplementary material
Source: PubMed Central journal article supplement (PMC6156297)
Supplement: zjm999096108s1.pdf [file zjm999096108s1.pdf]

## Supplementary Material

### Tables and Graphs

|                                               | 1     | 2      | 3      | 4     | 5     | 6     | 7     | 8      | 9      | 10    |
|-----------------------------------------------|-------|--------|--------|-------|-------|-------|-------|--------|--------|-------|
| KY969482_California_2017(G)                   |       | 98.84  | 98.84  | 95.95 | 97.69 | 95.95 | 95.38 | 95.95  | 95.95  | 86.13 |
| KY680537_Canada_2017(G)                       | 98.84 |        | 100.00 | 97.11 | 98.84 | 97.11 | 96.53 | 97.11  | 97.11  | 87.28 |
| MF965227_Massachusetts_2017(G)                | 98.84 | 100.00 |        | 97.11 | 98.84 | 97.11 | 96.53 | 97.11  | 97.11  | 87.28 |
| KF738113_India_2016(G)                        | 95.95 | 97.11  | 97.11  |       | 97.11 | 97.69 | 94.80 | 95.38  | 95.38  | 86.71 |
| KY604739_India_2017(G)                        | 97.69 | 98.84  | 98.84  | 97.11 |       | 97.11 | 96.53 | 97.11  | 97.11  | 86.13 |
| AF280799_UK_2001(G)                           | 95.95 | 97.11  | 97.11  | 97.69 | 97.11 |       | 94.80 | 95.38  | 95.38  | 87.28 |
| KM597072_Gabon_2015(G)                        | 95.38 | 96.53  | 96.53  | 94.80 | 96.53 | 94.80 |       | 94.80  | 94.80  | 85.55 |
| MG765427_MuVi_Dunedin.NZL_32.17(G)            | 95.95 | 97.11  | 97.11  | 95.38 | 97.11 | 95.38 | 94.80 |        | 100.00 | 85.55 |
| MG765426_MuVi_NewPlymouth.NZL_30.17(G)        | 95.95 | 97.11  | 97.11  | 95.38 | 97.11 | 95.38 | 94.80 | 100.00 |        | 85.55 |
| FJ211584 strain RIT4385 NZ vaccine strain (A) | 86.13 | 87.28  | 87.28  | 86.71 | 86.13 | 87.28 | 85.55 | 85.55  | 85.55  |       |

Table S1. Pairwise comparison of hemagglutinin-neuraminidase (HN) protein sequences of selected Mumps viruses. Genotype is indicated in parenthesis.

| Sample number | CDC* method (Ct) | modified method (Ct) | Difference (Ct) |
|---------------|------------------|----------------------|-----------------|
| 3886          | 30               | 26                   | 4               |
| 3887          | 26               | 23                   | 3               |
| 3888          | 39               | 34                   | 5               |
| 4176          | 29               | 25                   | 4               |
| 4178          | 34               | 31                   | 3               |
| 4199          | 35               | 31                   | 4               |
| 4200          | 34               | 31                   | 3               |
| 4247          | 39               | 33                   | 6               |
| 4248          | 31               | 27                   | 4               |
| 4249          | 28               | 25                   | 3               |
| 4250          | 32               | 28                   | 4               |
| 4251          | 32               | 28                   | 4               |
| 4316          | 38               | 34                   | 4               |
| 4318          | 34               | 30                   | 4               |
| 4369          | 34               | 30                   | 4               |
| 4390          | >40              | 39                   | >1              |
| 4467          | 34               | 31                   | 3               |
| 4523          | >40              | 39                   | >1              |
| 4525          | 29               | 24                   | 5               |
| 4526          | 32               | 29                   | 3               |
| 4585          | 28               | 27                   | 1               |
| 4702          | 33               | 29                   | 4               |
| 4770          | 33               | 29                   | 4               |
| 4771          | >40              | 34                   | >6              |

|                                  |              |              |    |
|----------------------------------|--------------|--------------|----|
| 4837                             | 33           | 29           | 4  |
| 5551                             | 34           | 31           | 3  |
| 5752                             | 35           | 31           | 4  |
| 5921                             | >40          | 38           | >2 |
| 5947                             | 29           | 26           | 3  |
| 5949                             | 33           | 30           | 3  |
| 6057                             | 32           | 29           | 3  |
| 6058                             | 28           | 25           | 3  |
| 6059                             | 30           | 26           | 4  |
| 6105                             | 39           | 37           | 2  |
| 6107                             | 34           | 28           | 6  |
| 6132                             | 39           | 34           | 5  |
| 6133                             | 31           | 28           | 3  |
| 6167                             | 33           | 28           | 5  |
| 6169                             | 28           | 23           | 5  |
| 6236                             | 40           | 34           | 6  |
| 6237                             | 37           | 33           | 4  |
| 6238                             | 27           | 22           | 5  |
| 6240                             | 34           | 29           | 5  |
| 6396                             | 37           | 33           | 4  |
| 6397                             | 34           | 32           | 2  |
| 6398                             | 34           | 31           | 3  |
| 6494                             | 27           | 24           | 3  |
| 6564                             | 28           | 24           | 2  |
| 6648                             | Undetermined | 41           |    |
| Mumps (A) positive control (MMR) | 25           | 25           | 0  |
| Mumps (A) positive control (MMR) | 26           | 27           | 1  |
| NTC                              | Undetermined | Undetermined |    |
| NTC                              | Undetermined | Undetermined |    |

Table S2. Real-time RT-PCR comparison for genotype G positive samples including duplicate tests for positive control (genotype A MMR) and negative control (water).

| Dilution | Genotype G with CDC* protocol |       |       |       |       |       | Mean  | STD  | No. of repli. | No. of pos. | % pos. | Probit value |
|----------|-------------------------------|-------|-------|-------|-------|-------|-------|------|---------------|-------------|--------|--------------|
|          |                               |       |       |       |       |       |       |      |               |             |        |              |
| 1.00E-02 | 23.91                         | 23.8  | 24.09 | 24.16 | 24.51 | 24.32 | 24.13 | 0.26 | 6             | 6           | 100    | NA           |
| 1.00E-03 | 28.93                         | 28.59 | 28.63 | 28.65 | 29.02 | 28.71 | 28.76 | 0.18 | 6             | 6           | 100    | NA           |
| 1.00E-04 | 32.86                         | 32.88 | 32.51 | 32.66 | 32.83 | 32.62 | 32.73 | 0.15 | 6             | 6           | 100    | NA           |
| 1.00E-05 | 36.82                         | 36.75 | 36.55 | 37.2  | 36.8  | 36.81 | 36.82 | 0.21 | 6             | 6           | 100    | NA           |
| 1.00E-06 | 40.92                         | 38.94 | 40.49 | 41.91 | 42.23 | 41.79 | 41.05 | 1.22 | 6             | 6           | 100    | NA           |
| 1.00E-07 | n.d.                          | 42.24 | n.d.  | n.d.  | n.d.  | n.d.  | 42.24 | NA   | 6             | 1           | 17     | 4.033        |

|          |      |      |      |      |      |      |    |    |   |   |   |    |
|----------|------|------|------|------|------|------|----|----|---|---|---|----|
| 1.00E-08 | n.d. | n.d. | n.d. | n.d. | n.d. | n.d. | NA | NA | 6 | 0 | 0 | NA |
|----------|------|------|------|------|------|------|----|----|---|---|---|----|

Table S3. Sensitivity testing of mumps virus genotype G with the CDC\* protocol (n.d. = not detected, NA = not assessed).

| Dilution | Genotype G with modified protocol |       |       |       |       |       | Mean  | STD  | No. of repli. | No. of pos. | % pos. | Probit value |
|----------|-----------------------------------|-------|-------|-------|-------|-------|-------|------|---------------|-------------|--------|--------------|
|          |                                   |       |       |       |       |       |       |      |               |             |        |              |
| 1.00E-02 | 21.97                             | 21.9  | 20.84 | 21.58 | 21.54 | 21.7  | 21.59 | 0.40 | 6             | 6           | 100    | NA           |
| 1.00E-03 | 26.54                             | 26.22 | 25.73 | 26.2  | 26.3  | 26.28 | 26.21 | 0.27 | 6             | 6           | 100    | NA           |
| 1.00E-04 | 30.29                             | 30.55 | 30    | 30.06 | 29.84 | 30.07 | 30.14 | 0.25 | 6             | 6           | 100    | NA           |
| 1.00E-05 | 34                                | 34.4  | 35.8  | 33.8  | 34.3  | 33.86 | 34.36 | 0.74 | 6             | 6           | 100    | NA           |
| 1.00E-06 | 37.83                             | 38.13 | 37.41 | 38.96 | 37.85 | 36.26 | 37.74 | 0.89 | 6             | 6           | 100    | NA           |
| 1.00E-07 | n.d.                              | 38.6  | 42.51 | 38.78 | n.d.  | n.d.  | 39.96 | 2.21 | 6             | 3           | 50     | 5.0          |
| 1.00E-08 | n.d.                              | n.d.  | n.d.  | n.d.  | n.d.  | n.d.  | NA    | NA   | 6             | 0           | 0      | NA           |

Table S4. Sensitivity testing of mumps virus genotype G with the modified assay (n.d. = not detected, NA = not assessed).

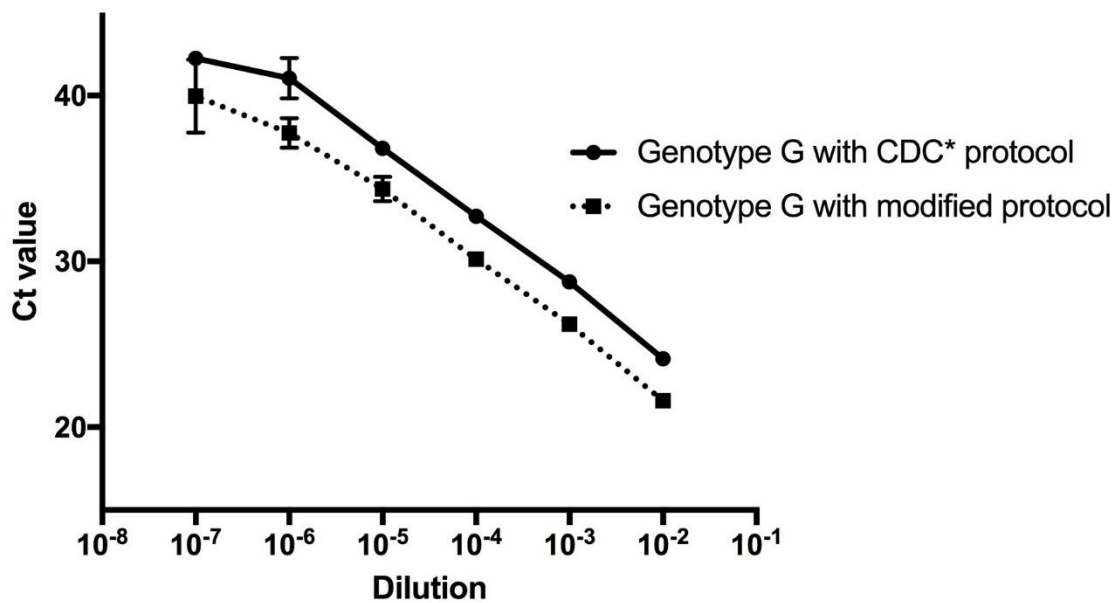

Graph S1: Comparison of analytical sensitivity on 10-fold dilutions of genotype G RNA (GraphPad Prism v7). Depicted are mean values and standard deviations.

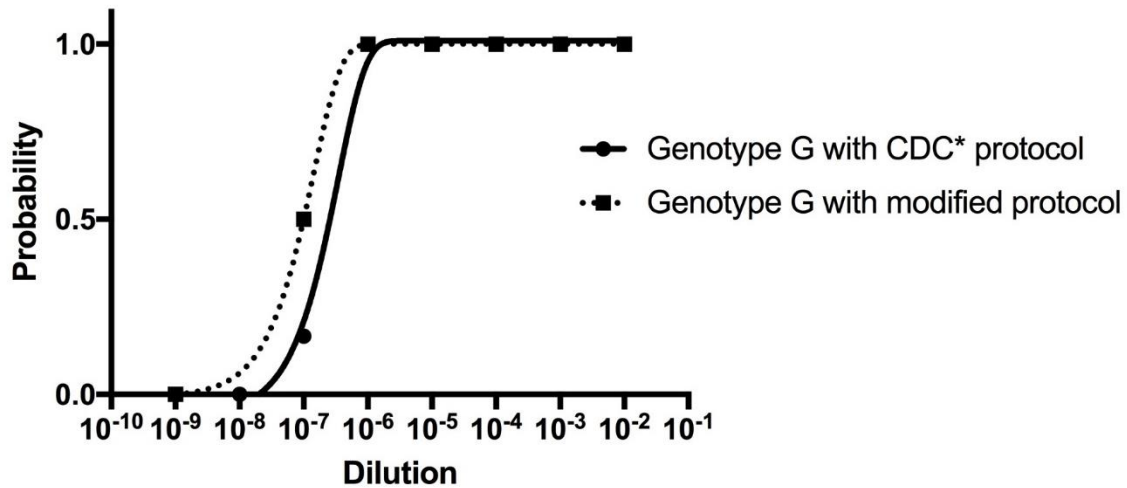

Graph S2: Probit regression analysis on 10-fold dilutions of Genotype G RNA (GraphPad Prism v7). The LoD (95% of samples test positive) for the CDC\* protocol is at a dilution factor of  $4.452 \times 10^{-7}$ , and for the modified assay at a dilution factor of  $2.666 \times 10^{-7}$ .

| Virus                | Sample number | original Ct value or delta cycle (DC) | Ct value with modified Mumps real-time PCR |
|----------------------|---------------|---------------------------------------|--------------------------------------------|
| Measles              | 0570          | 29                                    | n.d.                                       |
|                      | 6382          | 23                                    | n.d.                                       |
| VZV                  | 0352          | 24                                    | n.d.                                       |
|                      | 1467          | 25                                    | n.d.                                       |
| Parvovirus           | 0502          | 14                                    | n.d.                                       |
|                      | 8251          | 12                                    | n.d.                                       |
| Enterovirus          | 7705          | 28                                    | n.d.                                       |
|                      | 1262          | 27                                    | n.d.                                       |
| Adenovirus           | 8354          | 24                                    | n.d.                                       |
|                      | 846335        | 26                                    | n.d.                                       |
| Influenza A, H1N1    | 2979          | 19                                    | n.d.                                       |
| Influenza B          | 05314         | 15                                    | n.d.                                       |
| RSV                  | 5541          | 32                                    | n.d.                                       |
|                      | 5548          | 22                                    | n.d.                                       |
| Parainfluenza 1      | 5638          | 27                                    | n.d.                                       |
| Parainfluenza 2      | 5579          | 18                                    | n.d.                                       |
| HSV                  | 6001          | DC 6.35                               | n.d.                                       |
|                      | 8666          | DC 7.35                               | n.d.                                       |
| MMR positive control |               |                                       | 25.17                                      |
| negative control     |               |                                       | n.d.                                       |

Table S5. Assessment of analytical specificity of the modified mumps virus real-time PCR (DC = delta cycle, n.d. = not detected).

|                      | <b>Genotype</b> | <b>Ct value 1</b> | <b>Ct value 2</b> | <b>Ct value 3</b> |
|----------------------|-----------------|-------------------|-------------------|-------------------|
| <b>QCMD MM17S-07</b> | H               | 32.34             | 32.54             | 32.76             |
| <b>QCMD MM17S-08</b> | H               | 28.94             | 29.03             | 28.95             |
| <b>QCMD MM17S-09</b> | H               | 36.69             | 36.83             | 36.19             |
| <b>QCMD MM17S-10</b> | H               | 25.92             | 25.88             | 25.95             |

Table S6. Assessment of the accuracy of the modified mumps virus real-time PCR using proficiency QCMD mumps virus samples.
